# Supplementary material for: Water-generated dangling linkers in a metal-organic framework
Source: Research Square preprint supplement (doi:10.21203/rs.3.rs-7029407/v1), 2025-07-16
Supplement: Supplementary file 1 [file 9d76a7ae32d8003b915ead08.pdf]

## **Supporting Information**

### **Water-generated dangling linkers in a metal-organic framework**

Yao Fu<sup>1</sup>, Yifeng Yao<sup>2</sup>, Subhradip Paul<sup>1</sup>, Kenji Mochizuki<sup>2\*</sup>, Gaël De Paëpe<sup>1\*</sup>

<sup>1</sup> Univ. Grenoble Alpes, CEA, IRIG-MEM, 38000 Grenoble, France

<sup>2</sup> Department of Chemistry, Zhejiang University, 310027 Hangzhou, PR China

E-mail: kenji\_mochizuki@zju.edu.cn; gael.depaepe@cea.fr

## Experimental Procedures

### 1. Sample preparation.

#### 1.1 Synthesis of ideal UiO-66

The ideal UiO-66 was synthesized following the Lillerud's recipe<sup>1</sup>. We sequentially added 3.781 g ZrCl<sub>4</sub> (16.22 mmol), 2.865 ml 35 % HCl (32.45 mmol), and 5.391 g H<sub>2</sub>BDC(32.45 mmol) to a 150 ml Teflon liner containing 97.40 ml N,N'-dimethyl formamide (1258 mmol). After all the reagents dissolved, the liner was sealed in a stainless-steel autoclave and then placed in an oven at 220 °C for 24 hrs. The resulting ideal UiO-66 was washed three times with DMF, three times with methanol for a day each, and three times with deionized water for a day each. The washed products were separated from the solvent by centrifugation, dried under vacuum at 120 °C for 1 day, and grounded with a mortar and pestle. This sample is labelled as “fresh UiO-66”. The successful preparation of ideal UiO-66 was confirmed by powder X-ray diffraction and thermogravimetric analysis.

#### 1.2 Water adsorption / desorption in UiO-66

Two approaches were used for water adsorption in fresh UiO-66: (1) exposing the UiO-66 sample to ambient air for several days, or (2) directly adding a known volume of water (e.g., 10  $\mu$ L to 120  $\mu$ L) to 50 mg of MOF powder using a pipette. To ensure uniform water adsorption, the mixture was gently ground. Despite the water adsorption, the UiO-66 samples retained a dry appearance. For water desorption, these samples were heated to 120 °C under vacuum overnight to eliminate almost all the adsorbed water, resulting in the “dried” UiO-66 sample.

### 2. Characterization Methods

#### 2.1 Powder X-ray Diffraction (PXRD)

PXRD were carried out on samples placed on a quartz holder using a Rigaku Ultimate-IV X-ray diffractometer operated at 40 kV/30 mA with Cu K $\alpha$  line ( $\lambda$  = 1.5418 Å). Patterns were collected in reflectance Bragg-Brentano geometry in the 2 $\theta$  range from 3 to 50°.

#### 2.2 FT-IR

Fourier Transform Infrared (FT-IR) spectra were recorded on a Perkin-Elmer 100 FT-IR spectrometer, fitted with a liquid-nitrogen cooled mercury-cadmium-telluride (MCT) detector.

#### 2.3 Solid-state NMR

Room temperature <sup>13</sup>C and <sup>1</sup>H solid-state NMR experiments of fresh / dried and water adsorbed UiO-66 samples were performed on a Bruker Avance III HD 400 MHz NMR spectrometer (<sup>1</sup>H, 400.13 MHz; <sup>13</sup>C, 100.61 MHz;) using a 3.2 mm magic angle spinning (MAS)

probe.  $^1\text{H}$  spectra were acquired under the spinning rate of 10-20 kHz, using a one-pulse sequence, with a recycle delay of 4 s, which is 5 times longer than their spin-lattice relaxation times.  $^{13}\text{C}$  spectra were collected using either cross-polarization (CP) or direct polarization (DP) sequences under MAS of 15 kHz. The recycle delay for DP sequence was set to 250 s to ensure all the  $^{13}\text{C}$  signals were recovered to equilibrium, while the recycle delay of CP was set to 1.5 s. The  $^1\text{H}$  radio frequency (RF) field strength was 100 kHz and the  $^{13}\text{C}$  RF field strength was 83 kHz. Two-dimensional  $^1\text{H}$ - $^{13}\text{C}$  double quantum–single quantum (DQ-SQ) NMR experiments were conducted using a 1.3 mm MAS probe. The experiments employed a rotor-synchronized BABA (Back-to-Back) pulse sequence, with the mixing time set to one rotor period. The magic angle spinning (MAS) rate was maintained at 35 kHz. The  $^1\text{H}$  and  $^{13}\text{C}$  signals were referenced to those of adamantane at 1.8 ppm ( $^1\text{H}$ ) and 38.5 ppm ( $^{13}\text{C}$  methylene).

## 2.4 Dynamic nuclear polarization (DNP) experiments

For DNP sample preparation, a mixture containing 30 mg of the fresh MOF sample and 40  $\mu\text{L}$  of 10 mM AMUPol solution (comprising 60%  $\text{d}_6$ -glycerol, 30%  $\text{D}_2\text{O}$ , and 10%  $\text{H}_2\text{O}$  by volume) was transferred into a 3.2 mm zirconia thin rotor. Proton polarization enhancement originating from electron polarization was subsequently transferred to  $^{13}\text{C}$  nuclei via a standard CP step. The efficiency of the DNP process was obtained by comparing  $^{13}\text{C}$  CP spectra with and without microwave irradiation.

For DNP-enhanced  $^{13}\text{C}$ - $^{13}\text{C}$  double quantum-single quantum (DQ-SQ) experiments were performed on a Bruker Avance III 400 MHz system equipped a low temperature ( $\sim 100$  K) double resonance 3.2 mm MAS probe. The 2D spectra were recorded at 100 K and a MAS rate of 13.2 kHz. Dipolar recoupling sequence  $\text{S3}^{2,3}$  was used for DQ excitation and reconversion. 100 kHz RF-field strength was used for heteronuclear decoupling using  $\text{SW}_\text{f}$ -TPPM during indirect ( $t_1$ ) and direct ( $t_2$ ) detection periods, and continuous wave (CW) during S3 recoupling. A z-filter of 100  $\mu\text{s}$  was inserted before acquisition. Experiments were recorded with different mixing times. The double quantum recoupling efficiency curve for the S3 recoupling sequence, simulated under varying  $^{13}\text{C}$ - $^{13}\text{C}$  dipolar distances, was generated using the SIMPSON<sup>4</sup> software.

## 2.5 Calculation methods

### Structural optimization and energy calculation

Our system consisted of the unit cell of UiO-66 (Zr) with the formula  $[\text{Zr}_6\text{O}_4(\text{OH})_4(\text{BDC})_6]_4$ , where BDC represents 1,4-benzenedicarboxylate. The structure of intact UiO-66 was taken from ref.<sup>5</sup>. We studied both intact UiO-66 and UiO-66 with a dangling

linker. We optimized their structures by periodic density functional theory (DFT) simulations using the CP2K package<sup>6</sup>. Perdew-Burke-Ernzerhof (PBE) exchange correlation functional<sup>7</sup> was combined with DZVP-MOLOPT-SR-GTH basis set<sup>8,9</sup>. The Grimme's DFT-D3 semi-empirical method<sup>10</sup> was used to account for the van der Waals interactions. The plane-wave energy cutoff was 400 Ry. The integration over the irreducible Brillouin zone was computed over the Gamma point. Subsequently, the energies were computed by the PBE functional with pcseg-1 basis set<sup>11</sup> for H, C, and O atoms, and TZVP-MOLOPT-SR-GTH basis set for Zr atoms. The Self-Consistent Continuum Solvation (SCCS) implicit solvent model<sup>12,13</sup> was employed. All the CP2K input files are generated by Multiwfn package<sup>14</sup>.

### NMR calculation

We used the Gaussian 16 software to compute <sup>13</sup>C and <sup>1</sup>H NMR. A part of the energy-optimized structures, the so-called cluster model, was used without periodic boundary conditions to reduce the computational cost. We terminated the surface by adding hydrogen atoms and included a few water molecules inside. The cluster formula is represented by Zr<sub>6</sub>O<sub>4</sub>(OH)<sub>4</sub>(HCOO)<sub>22</sub>·nH<sub>2</sub>O (n=1 or 2). The positions of the added hydrogen atoms were optimized while fixing the remaining part, using the b3lyp functional<sup>15</sup> with 6-31G\* for H, C, and O atoms, and LANL2DZ basis set<sup>16</sup> for Zr atoms.

We first computed the isotropic magnetic shielding ( $\delta_{calc.}^X$ ) of <sup>13</sup>C and <sup>1</sup>H in the optimized structures using the Gauge-Invariant Atomic Orbital (GIAO) scheme<sup>17–20</sup>. The calculations were carried out with the revTPSS functional<sup>21,22</sup>, employing pcsSseg-1 basis set<sup>23</sup> for H, C and O atoms, while the LANL2TZ<sup>16,24</sup>, basis set was used for Zr atoms. The solvent model density (SMD) continuum solvation model was applied<sup>25</sup>. We then computed the chemical shift ( $\delta_{calc.}^X$ ) through an equation of  $\delta_{calc.}^X = \sigma_{calc.}^{ref.} - \sigma_{calc.}^X + \delta_{calc.}^{ref.}$ , where “*ref.*” and “*exp.*” represent reference and experiment, respectively. The  $\delta_{calc.}^{ref.}$  of 38.5 ppm on <sup>13</sup>C was taken from the methylene of adamantane and the  $\delta_{calc.}^{ref.}$  of 1.8 ppm on <sup>1</sup>H was taken from the adamantane protons.

## Supplementary Figures

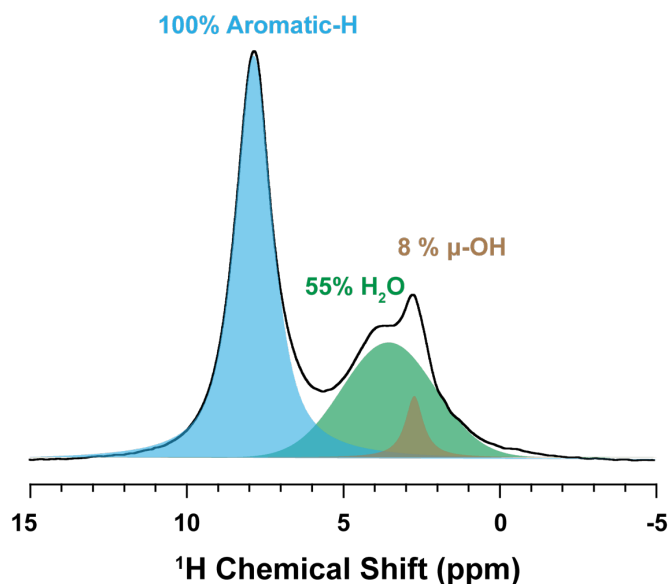

**Figure S1.** To calculate the adsorbed water content in MOF one unit cell, consider the following example: If the aromatic H is 100%, then for a unit cell  $\text{Zr}_{24}\text{O}_{24}(\text{BDC})_{24}$ , it would be  $100\%/4/24 = 1.04\%$ , as each  $\text{BDC}^{2-}$  linker has 4 aromatic protons. For  $\text{H}_2\text{O}$  protons is 55%, each  $\text{H}_2\text{O}$  molecule accounts for  $55\%/2 = 27.5\%$ . Therefore, the sample would be named as  $27.5/1.04 = 26 \text{ H}_2\text{O/u.c.}$

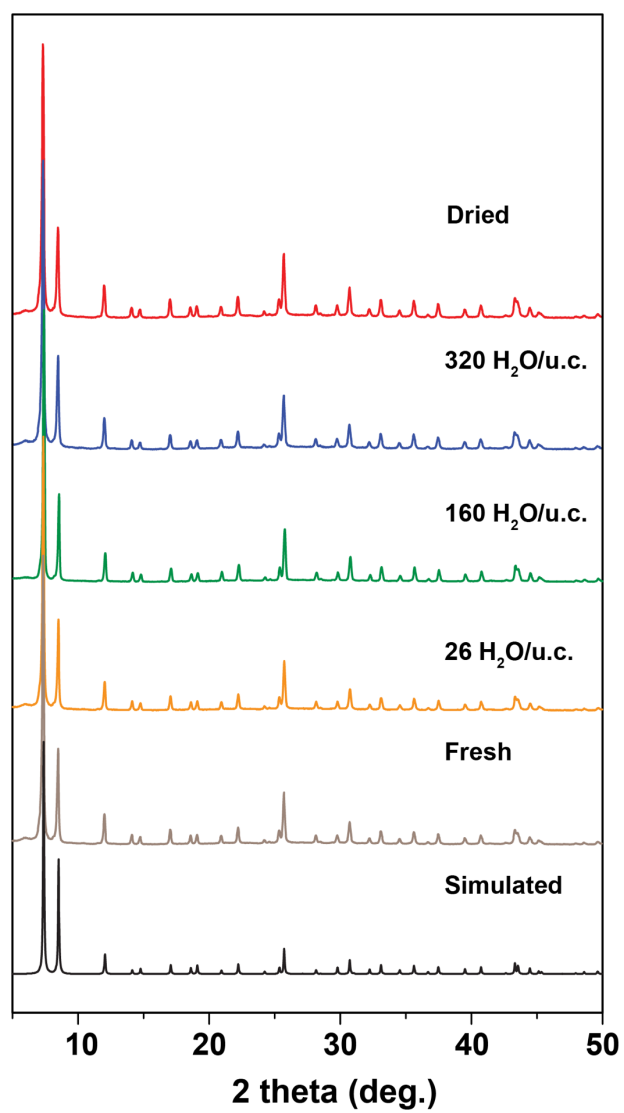

**Figure S2.** X-ray powder diffraction patterns of simulated UiO-66, UiO-66 samples with different water contents in the pores.

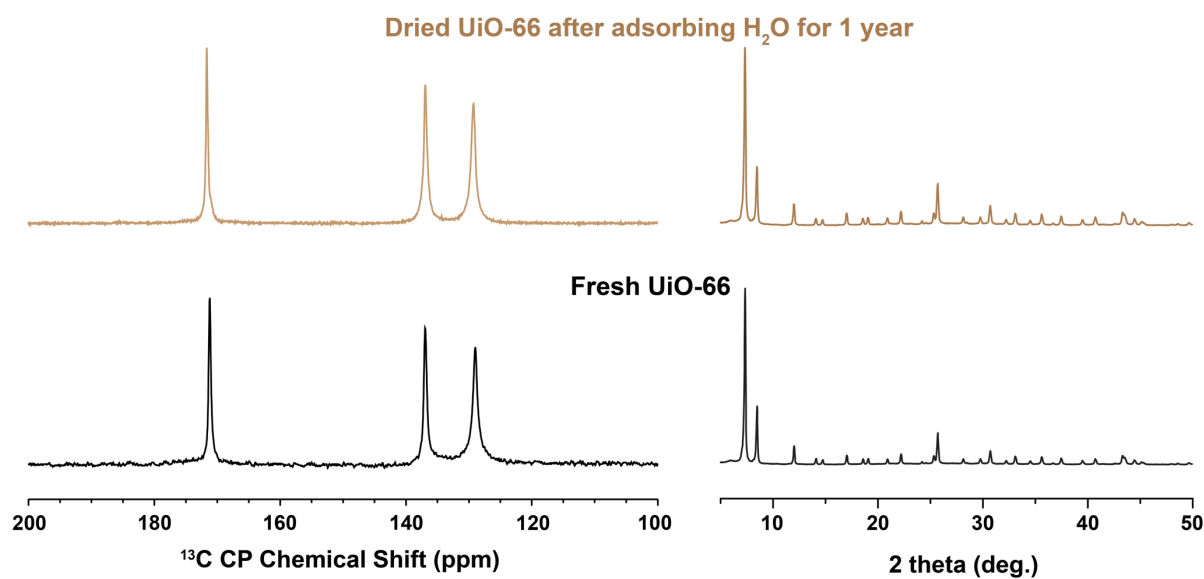

**Figure S3.** (left) <sup>13</sup>C cross-polarization spectra, and (b) X-ray powder diffraction patterns on fresh UiO-66 (black) and dried UiO-66 after adsorbing H<sub>2</sub>O for 1 year (yellow). The near-identical XRD patterns and <sup>13</sup>C NMR spectra of these two samples demonstrate the resilience and structural stability of UiO-66 under prolonged aqueous conditions.

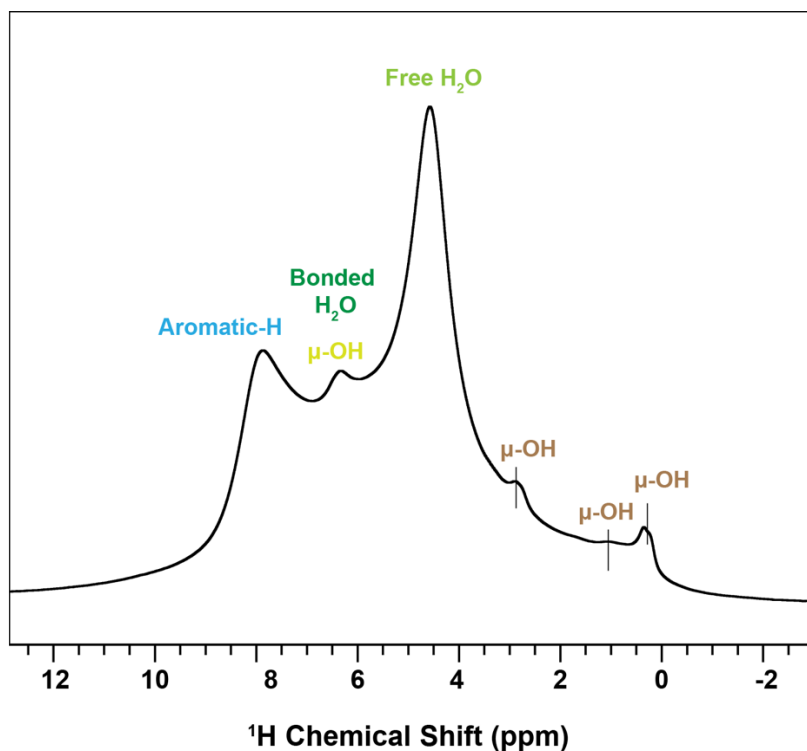

**Figure S4.** The  $^1\text{H}$  one-pulse spectrum of the 160  $\text{H}_2\text{O}$ /u.c. sample, recorded at a spinning rate of 35 kHz, provides improved  $^1\text{H}$  resolution compared to the spectrum shown in Figure 1b (recorded at a spinning rate of 10 kHz). This enhanced resolution reveals two distinct  $\text{H}_2\text{O}$  environments: free  $\text{H}_2\text{O}$  at 4.7 ppm and hydrogen-bonded water at 6.4 ppm. Additionally, three distinct  $\mu_3\text{-OH}$  sites are identified within the 0-3 ppm range.



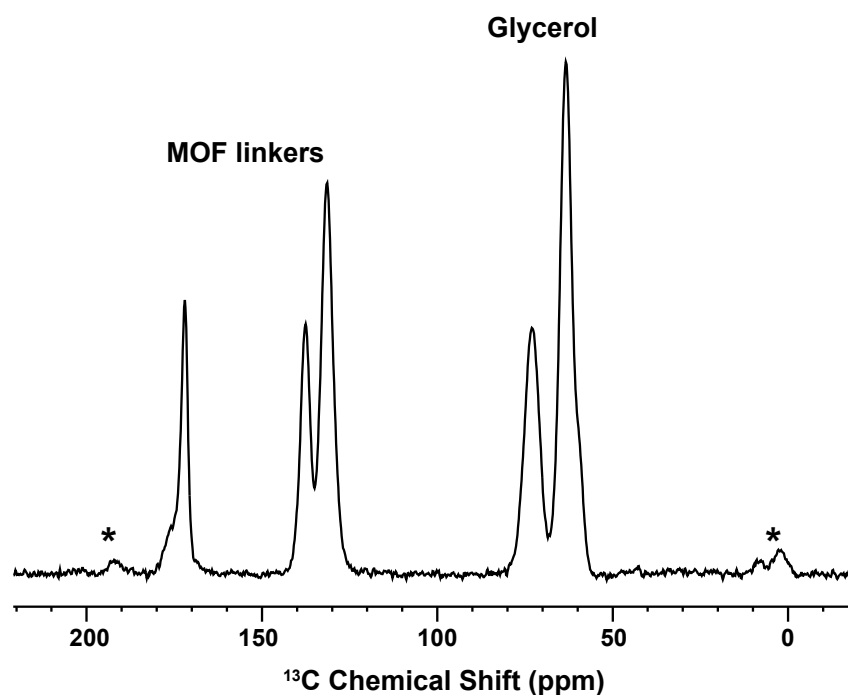

**Figure S5.** 1D  $\{^1\text{H}-\}^{13}\text{C}$  CPMAS spectrum of the UiO-66 DNP sample prepared with the polarizing agent AMUPol solution (consisting of 60%  $\text{d}_6$ -glycerol, 30%  $\text{D}_2\text{O}$ , and 10%  $\text{H}_2\text{O}$  by volume). Signals from  $^1\text{H}/^{13}\text{C}$  nuclei in AMUPol are generally not detectable because the nuclei are too close to unpaired electrons, leading to significant broadening of the resonances due to hyperfine coupling. However, the  $^{13}\text{C}$  signals from glycerol, appearing in the 50-80 ppm range, remain observable. The asterisk (\*) indicates the spinning sideband signal.

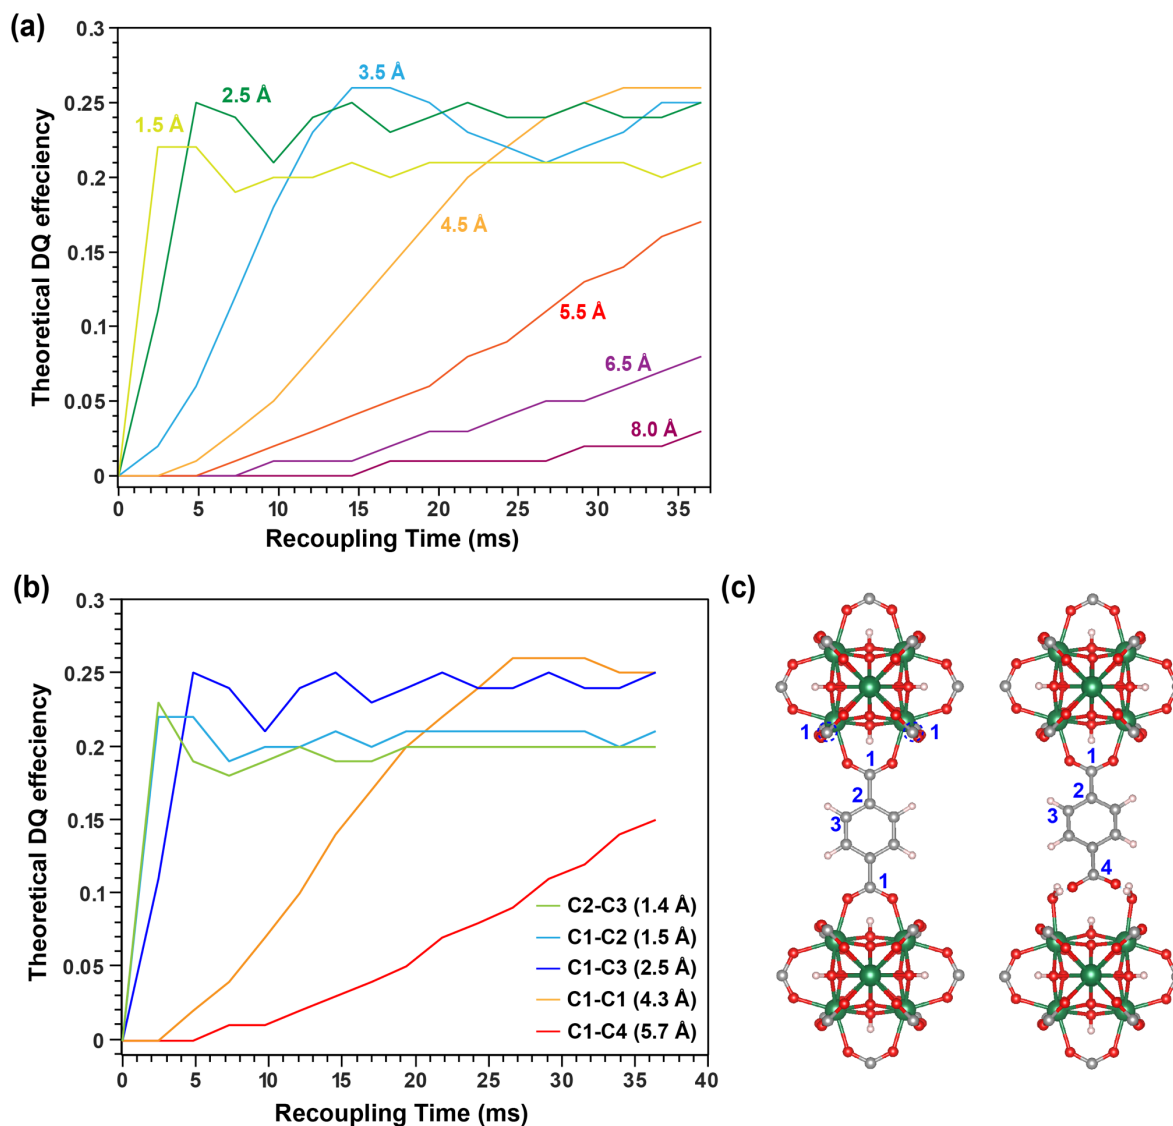

**Figure S6.** (a) SIMPSON simulations showing the  $^{13}\text{C}$ - $^{13}\text{C}$  2D double quantum (DQ) recoupling efficiency curve for the S3 recoupling sequence under varying  $^{13}\text{C}$ - $^{13}\text{C}$  dipolar distances. (b) SIMPSON simulations of the  $^{13}\text{C}$ - $^{13}\text{C}$  2D DQ recoupling efficiency curve for the S3 sequence at specific  $^{13}\text{C}$ - $^{13}\text{C}$  distances, as indicated in (c). Note that the C1-C1 distance refers to closest neighbouring linkers, rather than the opposite carbons within the same linker. The numerical simulations were done with 2 spins. The simulations shown in (a) was done with chemical shifts of 5 ppm and -5 ppm of isotropic chemical shifts. The simulations in (b) were done with experimental chemical shifts of the respective carbons. For every simulation 233 pairs of  $\alpha$  and  $\beta$  Euler angles were used based on Zaremba, Conroy and Wolfsburg (ZCW) scheme. For each of 233 pairs, 48  $\gamma$  angles were used for the carousel averaging<sup>4,26–28</sup>.

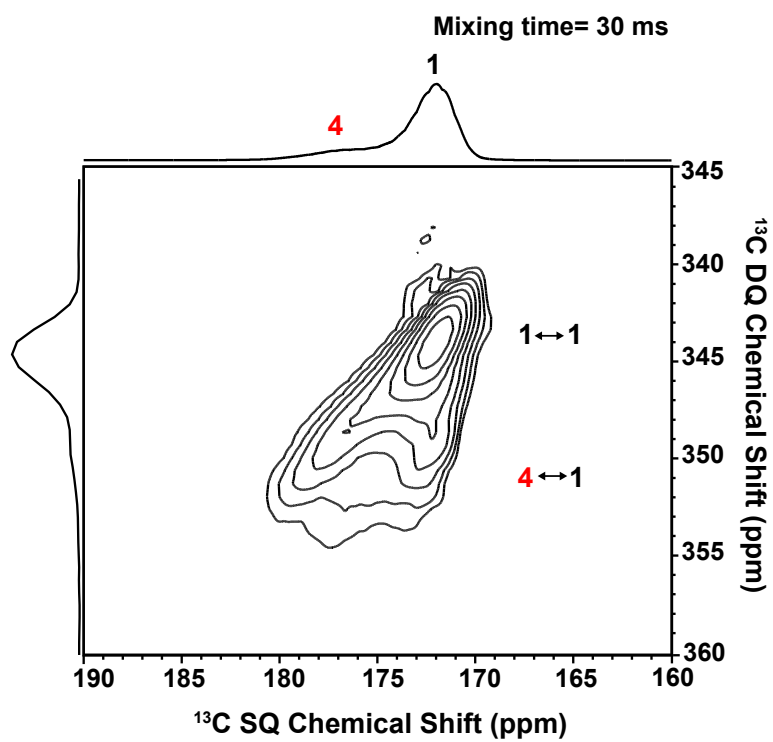

**Figure S7.** DNP-enhanced  $^{13}\text{C}$ - $^{13}\text{C}$  2D double-quantum single-quantum (DQ-SQ) correlation spectra of UiO-66 sample recorded at 100 K with mixing time of 30 ms.

Case A: the dangling linker is pointing towards  $\mu$ -OH

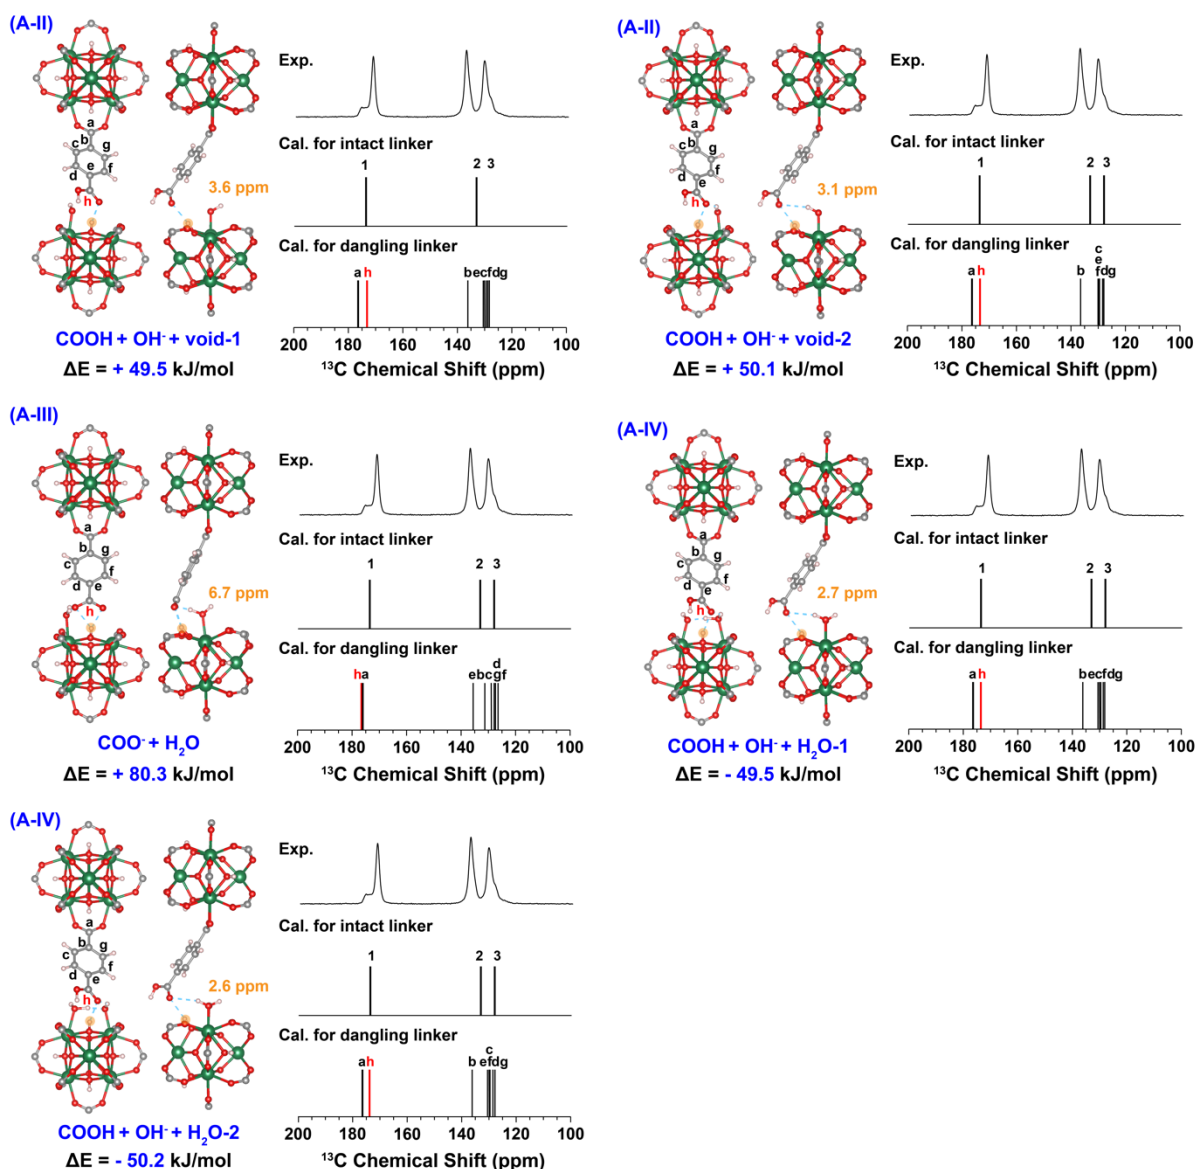

**Figure S8.** (Left) Various dangling linker configuration structures based on case A (where the dangling linker points toward  $\mu_3$ -OH) are presented, including front and side views optimized through DFT calculations. Green, red, grey, and white spheres represent Zr, O, C, and H atoms, respectively, with hydrogen bonding depicted by blue dashed lines. The quantum mechanical calculations provide the energies for each configuration. (Right) Experimental  $^{13}\text{C}$  CPMAS spectrum of the “320  $\text{H}_2\text{O}/\text{u.c.}$ ” sample and the calculated  $^{13}\text{C}$  chemical shifts of intact linker (structure shown in Figure 3a) and dangling linker structure based on configurations on the left. The calculated  $^1\text{H}$  chemical shifts for the labelled  $\mu_3$ -OH groups (highlighted in orange) in all the configurations are shown.

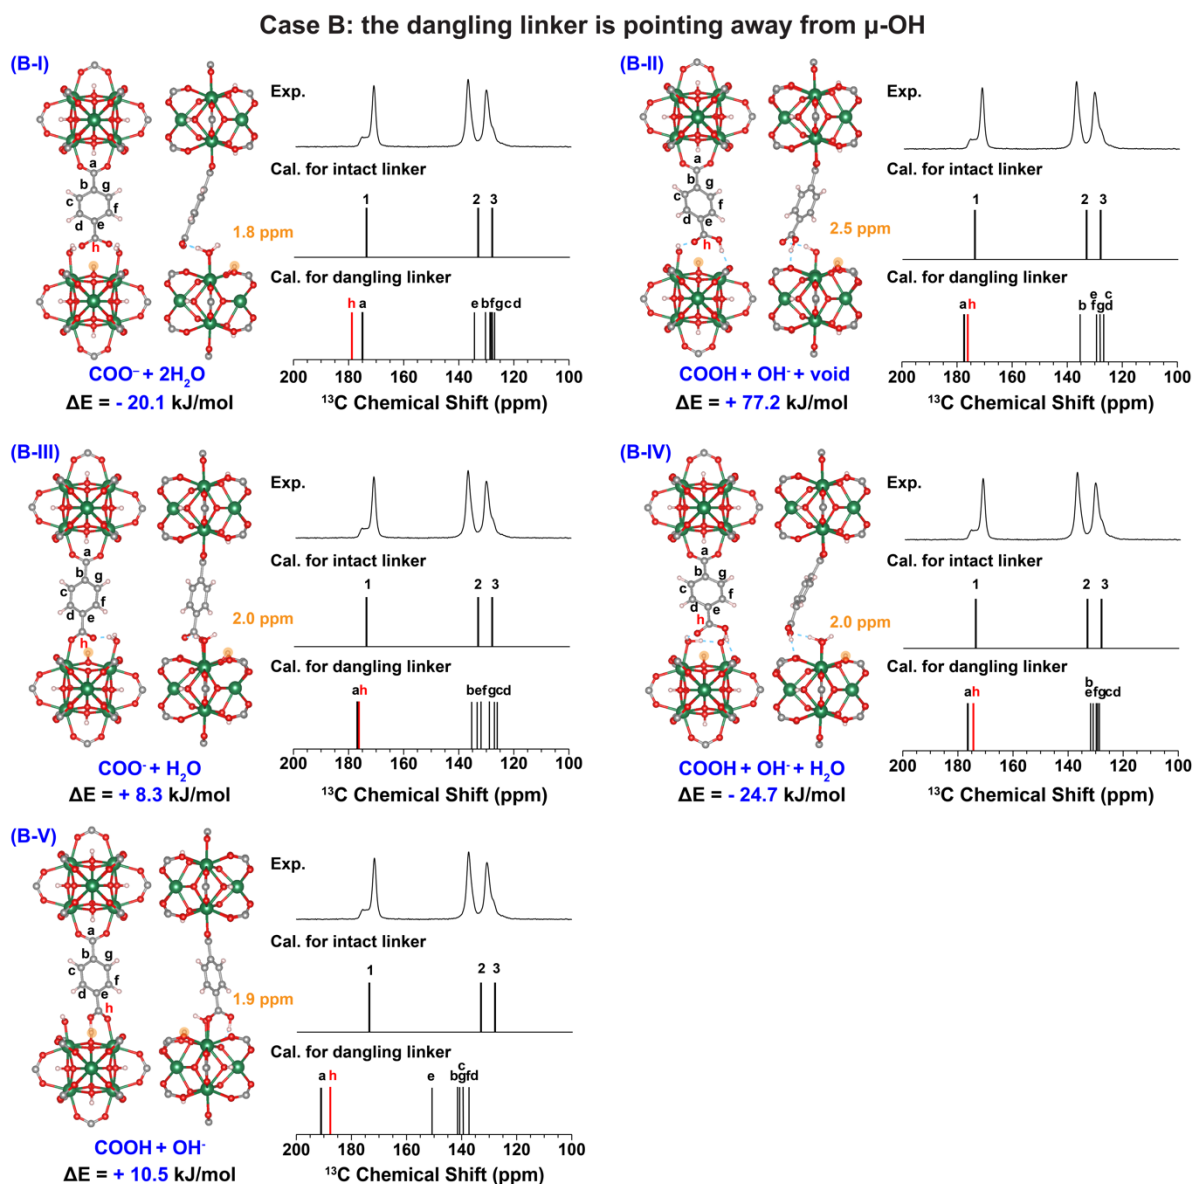

**Figure S9.** (Left) Various dangling linker configuration structures based on case B (where the dangling linker points away from  $\mu_3$ -OH) are presented, including front and side views optimized through DFT calculations. Green, red, grey, and white spheres represent Zr, O, C, and H atoms, respectively, with hydrogen bonding depicted by blue dashed lines. (Right) Experimental  $^{13}\text{C}$  CPMAS spectrum of the “320  $\text{H}_2\text{O}/\text{u.c.}$ ” sample and the calculated  $^{13}\text{C}$  chemical shifts of intact linker (structure shown in Figure 3a) and dangling linker structure based on configurations on the left. The calculated  $^1\text{H}$  chemical shifts for the labelled  $\mu_3$ -OH groups (highlighted in orange) in all the configurations are shown.

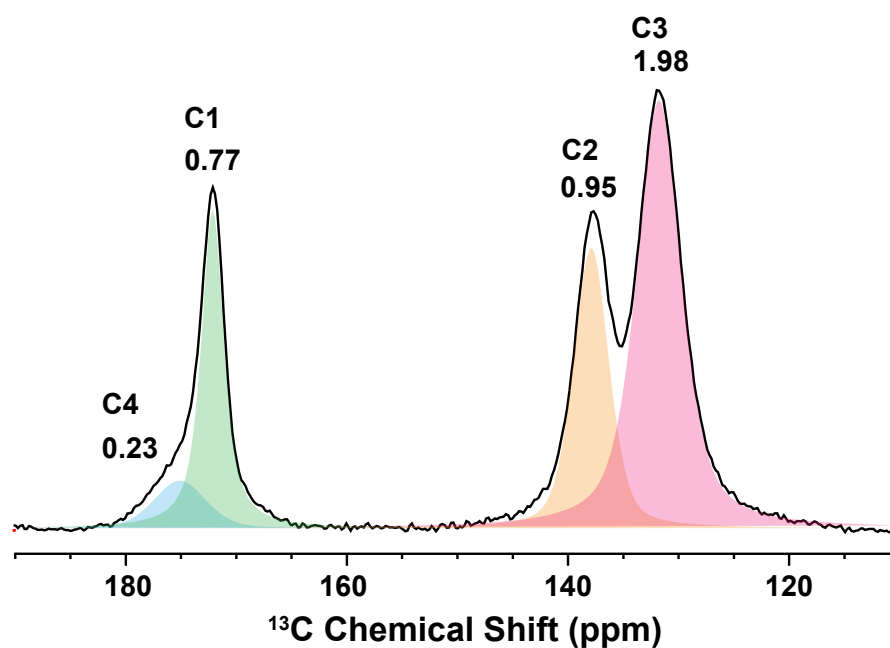

**Figure S10.** DNP enhanced  $^{13}\text{C}$  direct-polarization (DP) spectrum obtained from wet UiO-66 sample. The recycle delay for DP sequence was set to 250 s to ensure that all the  $^{13}\text{C}$  signals returned to equilibrium for accurate quantitative measurement. From the peak deconvolution, the ratio of (the dangling linker C4 + the intact linker C3): Benzene ring -C carbon C2 : Benzene ring -CH carbon C3 = 1:1:2. The accurate ratio between C1 and C2 from the benzene ring further supports that the dangling linker C4 is generated by the original intact linker C3.

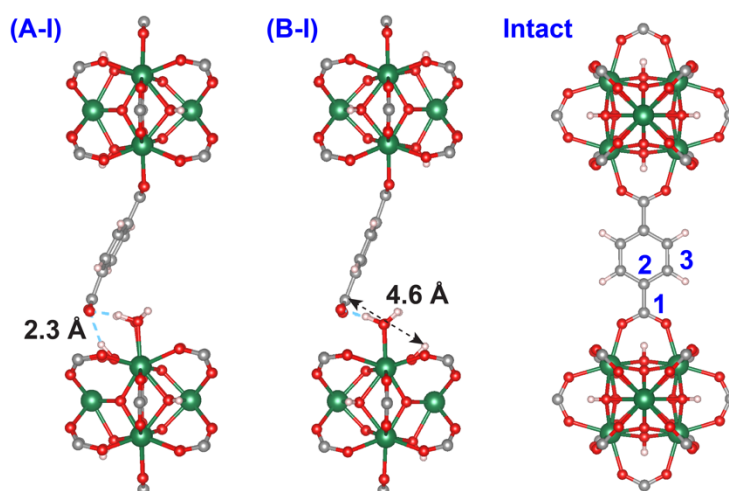

**Figure S11.** The distance between the dangling carboxylate carbon and the nearest  $\mu_3$ -OH proton is approximately 2.3 Å in configuration (A-I) and 4.6 Å in configuration (B-I) for the  $\text{COO}^- + 2\text{H}_2\text{O}$  configuration system. For the intact linker, the distances between  $\mu_3$ -OH and the nearest carbon atoms C1, C2, and C3 of the intact linker are approximately 2.6 Å, 3.8 Å, and 4.5 Å, respectively.

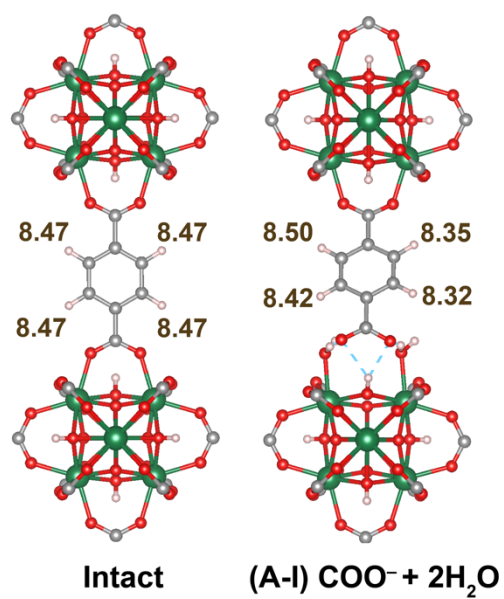

**Figure S12.** The calculated  $^1\text{H}$  chemical shifts of intact linker and dangling linker structure based on configurations shown in (A-I).



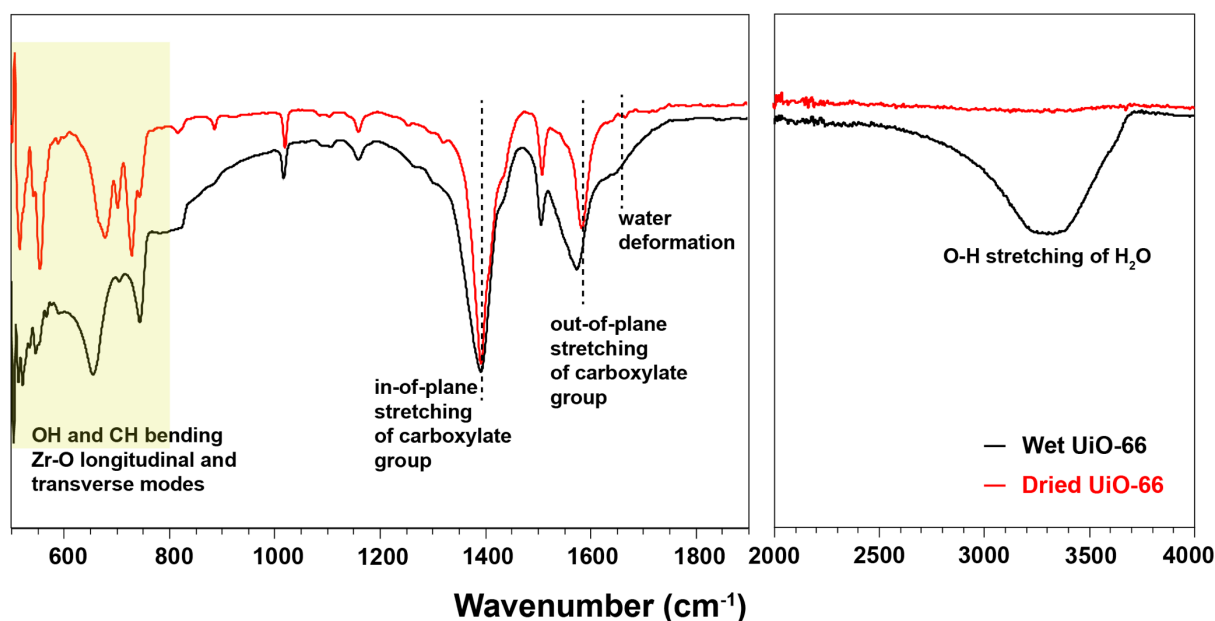

**Figure S13.** FTIR spectra of the dried UiO-66 sample (red curve) and the wet UiO-66 sample (black curve). Peaks in the range of 400-800  $\text{cm}^{-1}$  are attributed to OH and CH bending as well as Zr-O longitudinal and transverse vibrational modes. The peaks at 1395  $\text{cm}^{-1}$  and 1589  $\text{cm}^{-1}$  correspond to the in-plane and out-of-plane stretching vibrations of the carboxylate group, respectively. The peak at 1660  $\text{cm}^{-1}$  is assigned to water deformation, while the peak at 3300  $\text{cm}^{-1}$  is associated with OH stretching of  $\text{H}_2\text{O}$ .

## References

- (1) Shearer, G. C.; Chavan, S.; Ethiraj, J.; Vitillo, J. G.; Svelle, S.; Olsbye, U.; Lamberti, C.; Bordiga, S.; Lillerud, K. P. Tuned to Perfection: Ironing out the Defects in Metal-Organic Framework UiO-66. *Chem. Mater.* **2014**, *26* (14), 4068–4071.
- (2) Märker, K.; Paul, S.; Fernández-De-Alba, C.; Lee, D.; Mouesca, J. M.; Hediger, S.; De Paëpe, G. Welcoming Natural Isotopic Abundance in Solid-State NMR: Probing  $\pi$ -Stacking and Supramolecular Structure of Organic Nanoassemblies Using DNP. *Chem. Sci.* **2017**, *8* (2), 974–987.
- (3) Teymoori, G.; Pahari, B.; Edén, M. Low-Power Broadband Homonuclear Dipolar Recoupling in MAS NMR by Two-Fold Symmetry Pulse Schemes for Magnetization Transfers and Double-Quantum Excitation. *J. Magn. Reson.* **2015**, *261*, 205–220.
- (4) Bak, M.; Rasmussen, J. T.; Nielsen, N. C. SIMPSON: A General Simulation Program for Solid-State NMR Spectroscopy. *J. Magn. Reson.* **2000**, *147* (2), 296–330.
- (5) Yang, Q.; Guillerm, V.; Ragon, F.; Wiersum, A. D.; Llewellyn, P. L.; Zhong, C.; Devic, T.; Serre, C.; Maurin, G. CH<sub>4</sub> Storage and CO<sub>2</sub> Capture in Highly Porous Zirconium Oxide Based Metal–Organic Frameworks. *Chem. Commun.* **2012**, *48* (79), 9831–9833.
- (6) Hutter, J.; Iannuzzi, M.; Schiffmann, F.; Vandevondele, J. Cp2k: Atomistic Simulations of Condensed Matter Systems. *Wiley Interdiscip. Rev. Comput. Mol. Sci.* **2014**, *4* (1), 15–25.
- (7) Perdew, J. P.; Burke, K.; Ernzerhof, M. Generalized Gradient Approximation Made Simple. *Phys. Rev. Lett.* **1996**, *77* (18), 3865–3868.
- (8) Goedecker, S.; Teter, M. Separable Dual-Space Gaussian Pseudopotentials. *Phys. Rev. B* **1996**, *54* (3), 1703–1710.
- (9) Vandevondele, J.; Hutter, J. Gaussian Basis Sets for Accurate Calculations on Molecular Systems in Gas and Condensed Phases. *J. Chem. Phys.* **2007**, *127* (11).
- (10) Grimme, S.; Antony, J.; Ehrlich, S.; Krieg, H. A Consistent and Accurate Ab Initio Parametrization of Density Functional Dispersion Correction (DFT-D) for the 94 Elements H–Pu. *J. Chem. Phys.* **2010**, *132* (15), 154104.
- (11) Jensen, F. Unifying General and Segmented Contracted Basis Sets. Segmented Polarization Consistent Basis Sets. *J. Chem. Theory Comput.* **2014**, *10* (3), 1074–1085.
- (12) Andreussi, O.; Dabo, I.; Marzari, N. Revised Self-Consistent Continuum Solvation in Electronic-Structure Calculations. *J. Chem. Phys.* **2012**, *136* (6), 064102.
- (13) Fattebert, J. L.; Gygi, F. Density Functional Theory for Efficient Ab Initio Molecular Dynamics Simulations in Solution. *J. Comput. Chem.* **2002**, *23* (6), 662–666.
- (14) Lu, T.; Chen, F. Multiwfn: A Multifunctional Wavefunction Analyzer. *J. Comput. Chem.* **2012**, *33* (5), 580–592.
- (15) Lecklider, T. Development of the Colic-Salvetti Correlation-Energy Formula into a Functional of the Electron Density. *Phys. Rev. B* **1988**, *37* (2), 36–39.
- (16) Hay, P. J.; Wadt, W. R. Ab Initio Effective Core Potentials for Molecular Calculations. Potentials for the Transition Metal Atoms Sc to Hg. *J. Chem. Phys.* **1985**, *82* (1), 270–283.
- (17) Wolinski, K.; Hinton, J. F.; Pulay, P. Efficient Implementation of the Gauge-Independent Atomic Orbital Method for NMR Chemical Shift Calculations. *J. Am. Chem. Soc.* **1990**, *112* (23), 8251–8260.
- (18) Ditchfield, R. Self-Consistent Perturbation Theory of Diamagnetism I. A Gauge-Invariant LCAO Method for N.M.R. Chemical Shifts. *Mol. Phys.* **1974**, *27* (4), 789–807.
- (19) Ditchfield, R. Molecular Orbital Theory of Magnetic Shielding and Magnetic Susceptibility. *J. Chem. Phys.* **1972**, *56* (11), 5688–5691.

- (20) McMichael Rohlfing, C.; Allen, L. C.; Ditchfield, R. Proton and Carbon-13 Chemical Shifts: Comparison between Theory and Experiment. *Chem. Phys.* **1984**, *87* (1), 9–15.
- (21) Tao, J.; Perdew, J. P.; Staroverov, V. N.; Scuseria, G. E. Climbing the Density Functional Ladder: Nonempirical Meta-Generalized Gradient Approximation Designed for Molecules and Solids. *Phys. Rev. Lett.* **2003**, *91* (14), 3–6.
- (22) Perdew, J. P.; Ruzsinszky, A.; Csonka, G. I.; Constantin, L. A.; Sun, J. Workhorse Semilocal Density Functional for Condensed Matter Physics and Quantum Chemistry. *Phys. Rev. Lett.* **2009**, *103* (2), 10–13.
- (23) Jensen, F. Segmented Contracted Basis Sets Optimized for Nuclear Magnetic Shielding. *J. Chem. Theory Comput.* **2015**, *11* (1), 132–138.
- (24) Roy, L. E.; Hay, P. J.; Martin, R. L. Revised Basis Sets for the LANL Effective Core Potentials. *J. Chem. Theory Comput.* **2008**, *4* (7), 1029–1031.
- (25) Marenich, A. V.; Cramer, C. J.; Truhlar, D. G. Universal Solvation Model Based on Solute Electron Density and on a Continuum Model of the Solvent Defined by the Bulk Dielectric Constant and Atomic Surface Tensions. *J. Phys. Chem. B* **2009**, *113* (18), 6378–6396.
- (26) Zaremba, S. K. Good Lattice Points, Discrepancy, and Numerical Integration. *Ann. Mat. Pura Ed Appl. Ser. 4* **1966**, *73* (1), 293–317.
- (27) Conroy, H. Molecular Schrödinger Equation. VIII. A New Method for the Evaluation of Multidimensional Integrals. *J. Chem. Phys.* **1967**, *47* (12), 5307–5318.
- (28) Cheng, V. B.; Suzukawa, H. H.; Wolfsberg, M. Investigations of a Nonrandom Numerical Method for Multidimensional Integration. *J. Chem. Phys.* **1973**, *59* (8), 3992–3999.
